# Supplementary material for: Comparative epigenomics in the Brassicaceae reveals two evolutionarily conserved modes of PRC2-mediated gene regulation
Source: PubMed Central journal article supplement (PMC5663038; doi:10.1186/s13059-017-1333-9), 2017-10-31
Supplement: 13059_2017_1333_MOESM1_ESM.pdf [file 13059_2017_1333_MOESM1_ESM.pdf]

Figure S1

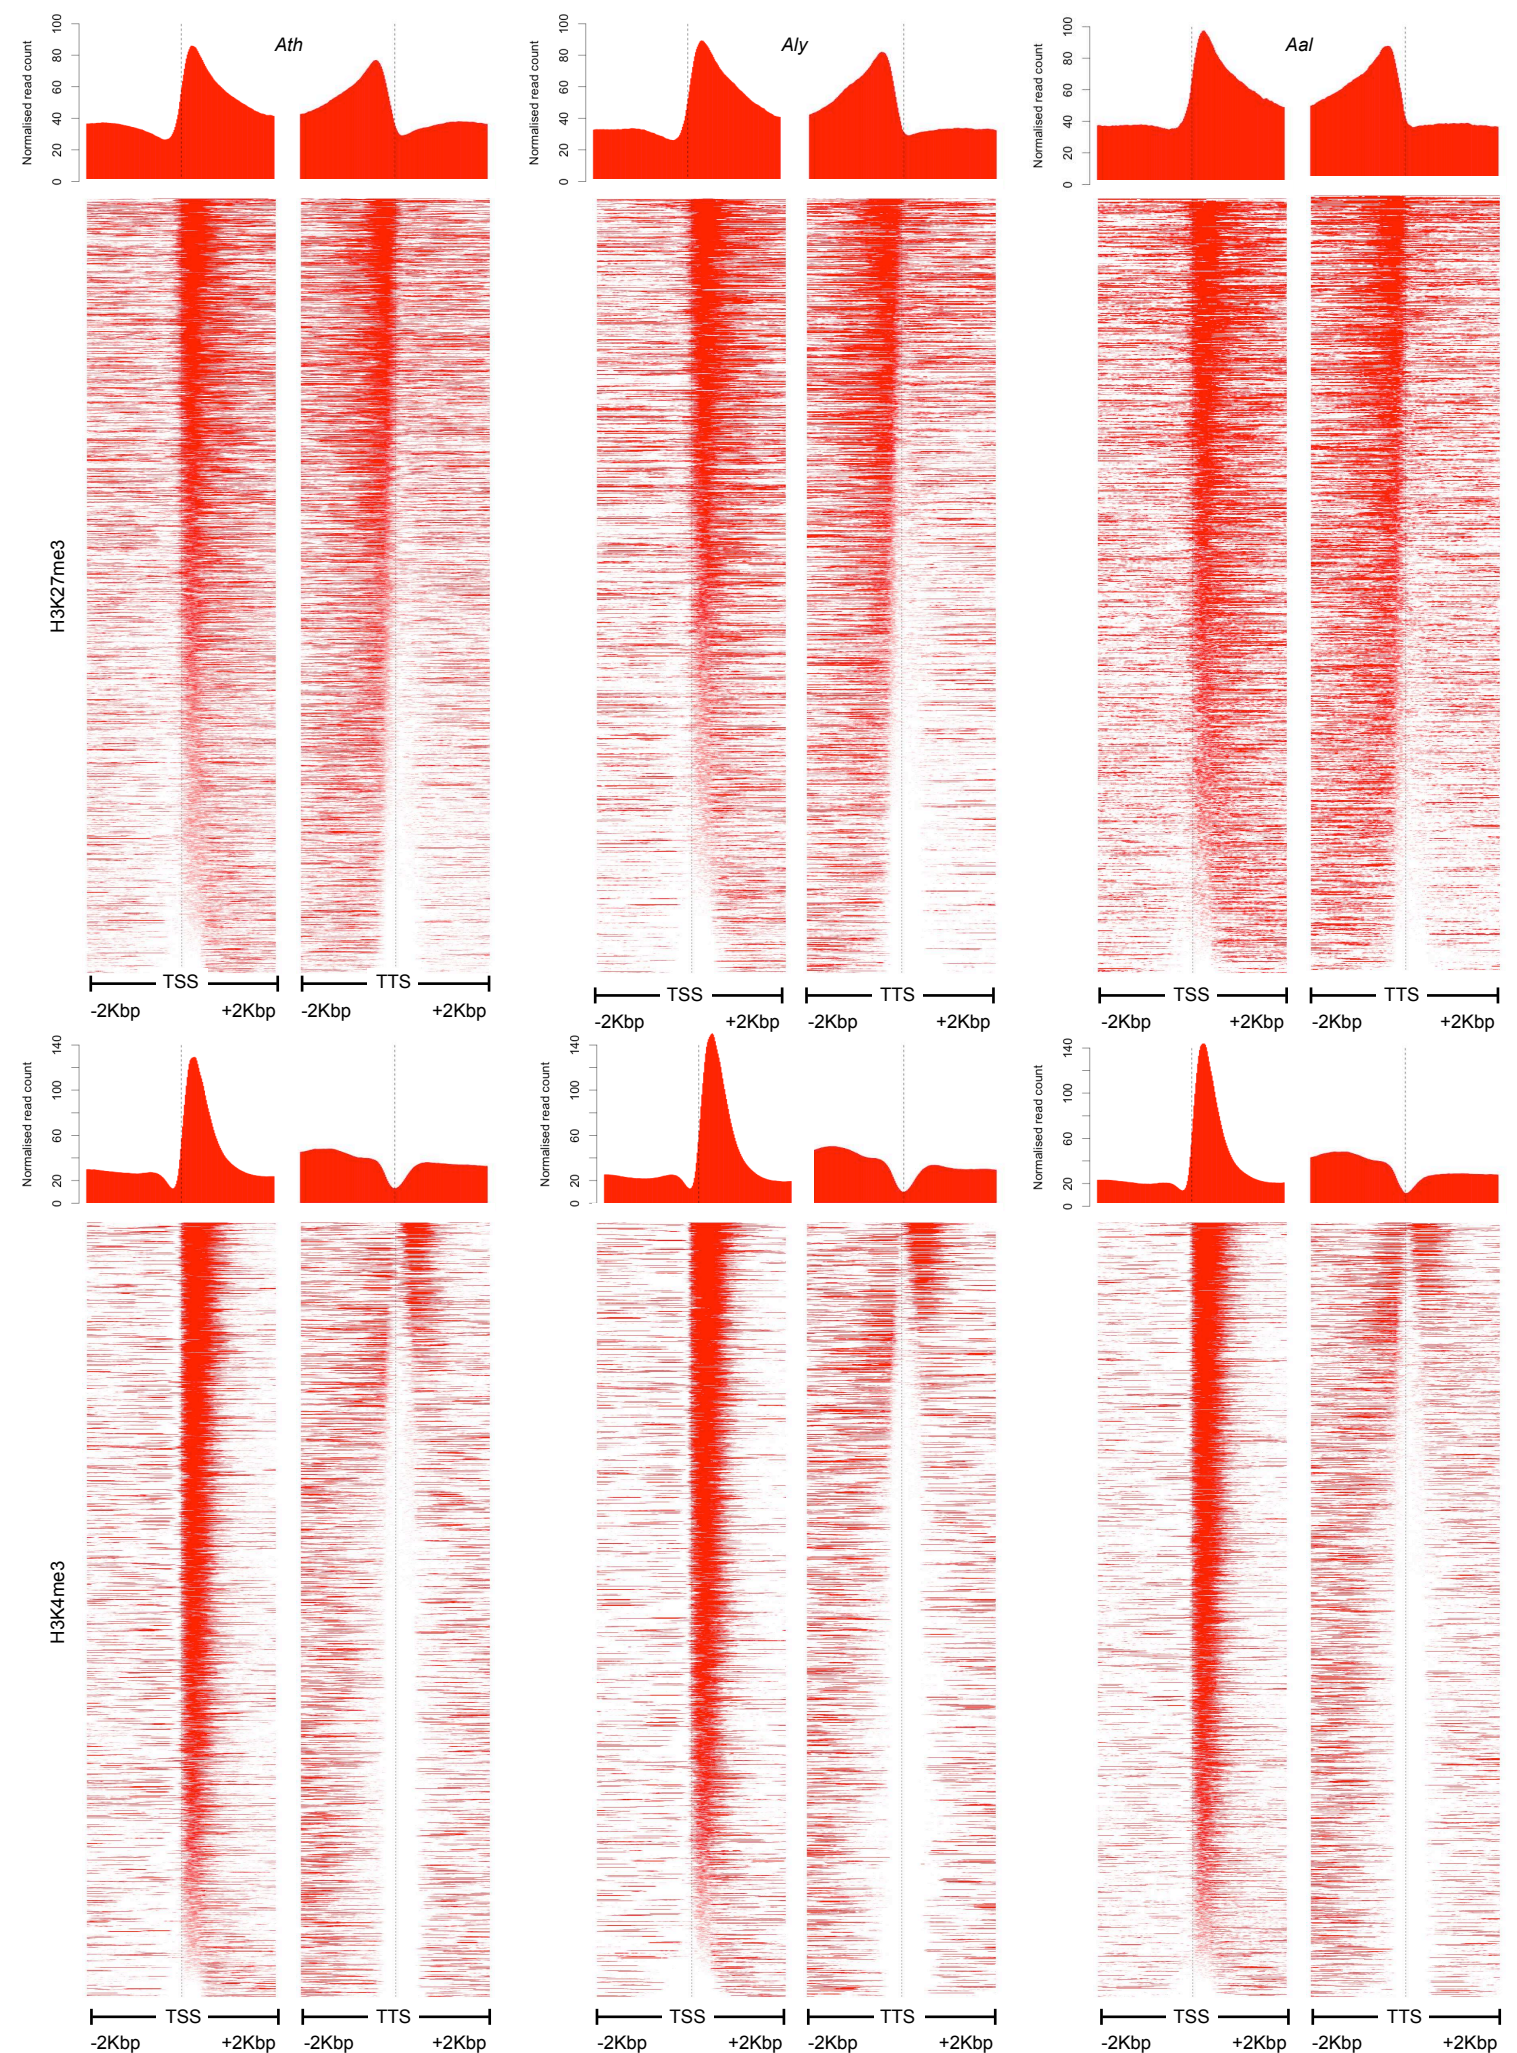

**Figure S1. Pattern of H3K27me3 and H3K4me3 enrichment over marked genes.** Normalized read coverage at the transcription start (TSS) and termination sites (TTS) of all gene orthologs marked by H3K27me3 and H3K4me3 in each of the three species.

Figure S2

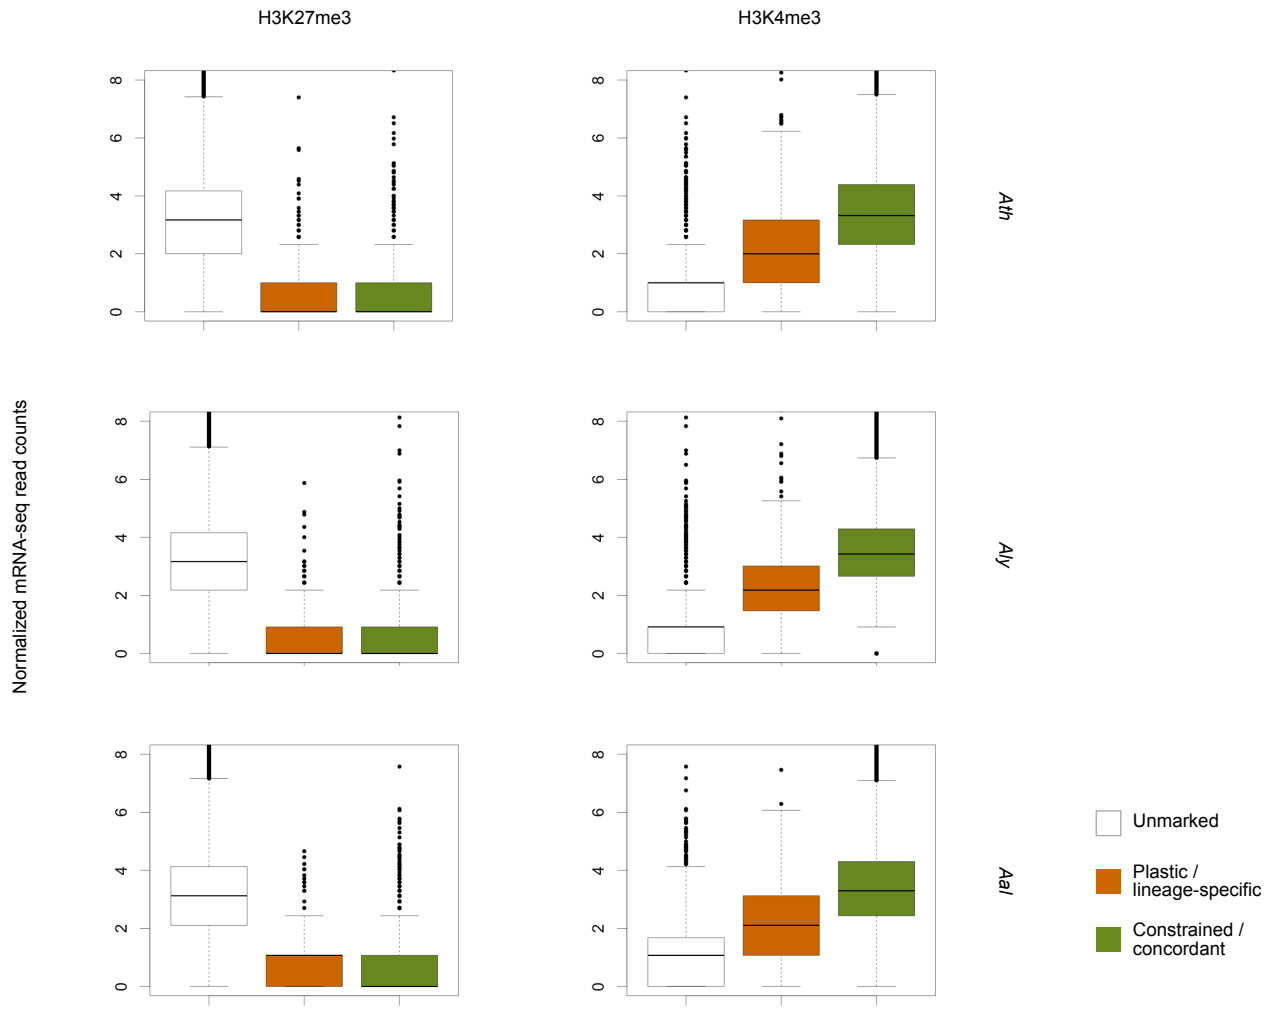

**Figure S2. Average expression level of gene orthologs according to their marking status.** Gene expression levels were estimated using normalized average read count per annotation. Left panels: gene orthologs with plastic or constrained H3K27me3 marking. Right panels: gene orthologs with lineage-specific or concordant H3K4me3 marking. Expression levels of unmarked genes are also shown in each panel. Gene orthologs with both H3K27me3 and H3K4me3 marking are not included in this analysis.

Figure S3

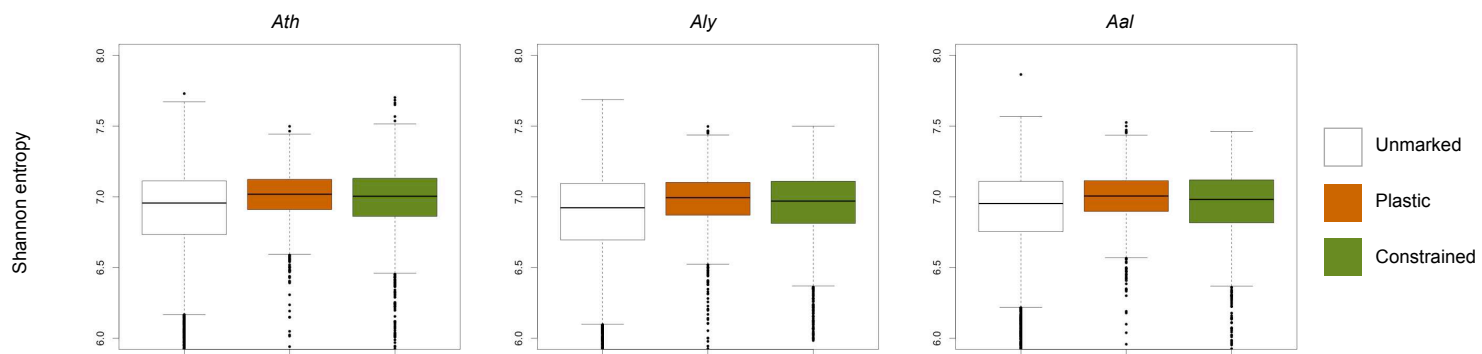

**Figure S3. Shannon entropy distribution of promoter sequences of gene orthologs with plastic or constrained H3K27me3 marking.** Shannon entropy was calculated for each promoter sequence using the frequency of 4-mers and plotted for the different gene sets indicated.

Figure S4

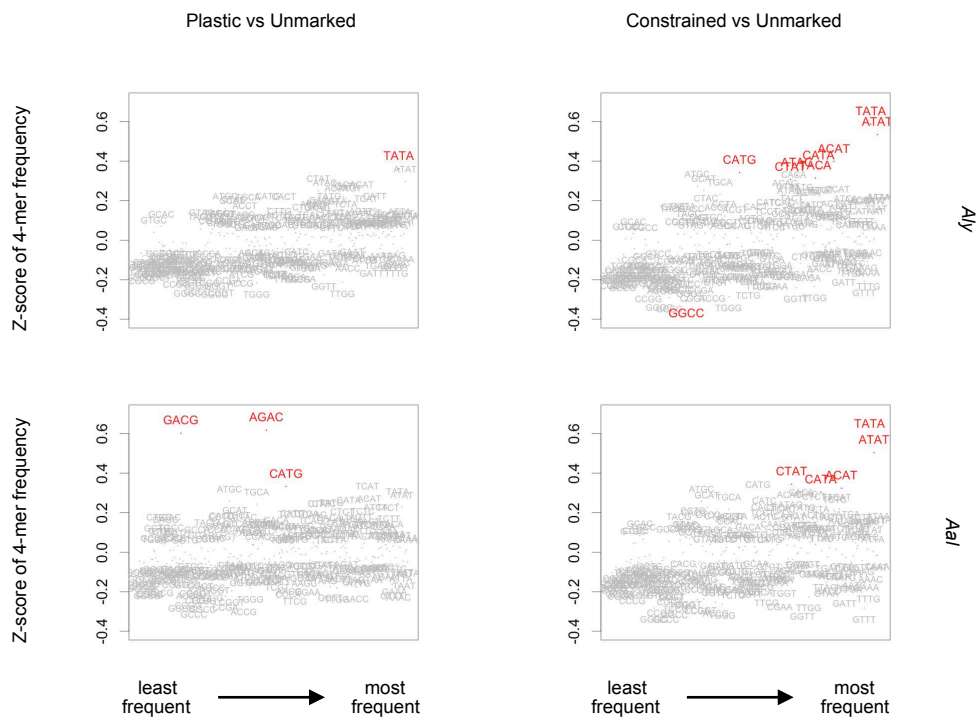

**Figure S4. Sequence enrichment (4-mers) for the promoters of orthologs with plastic and constrained H3K27me3 marking in Aly and Aal.** Positive and negative Z-score values indicate higher and lower frequencies of 4-mers in comparison to unmarked gene orthologs (4-mers showing highest/lowest frequency are highlighted in red).

Figure S5

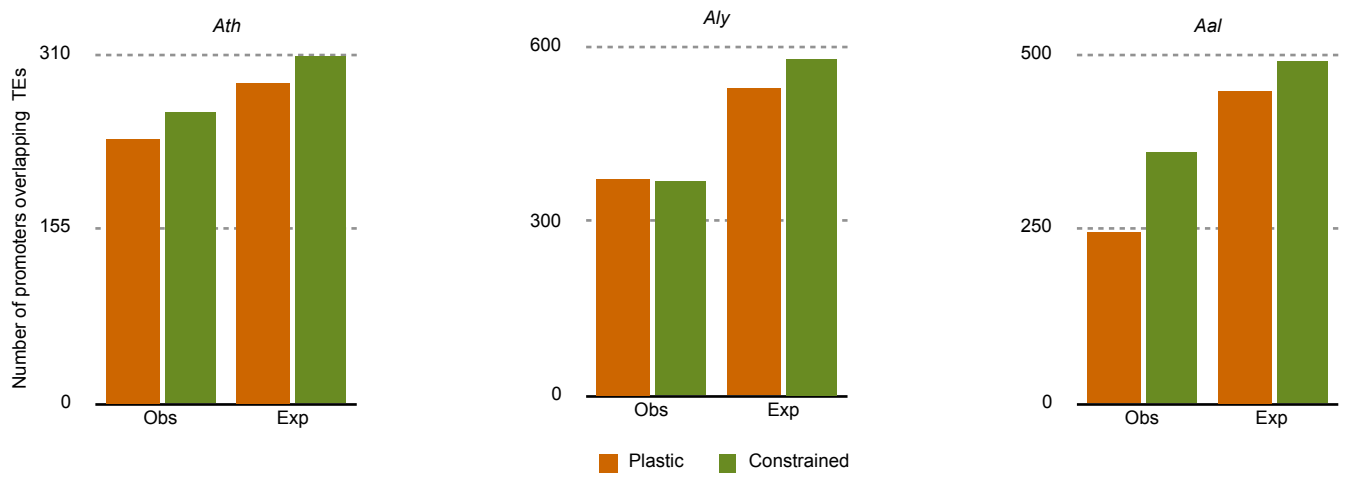

**Figure S5. Transposable elements overlapping promoters of gene orthologs with plastic or constrained H3K27me3 marking.**

The number of gene promoters overlapping a transposable element (TE) sequence is indicated. Both gene categories are significantly depleted in TE sequences in comparison to the expected frequency of overlap between any gene and a TE sequence genome wide (Exp; Chi-squared test, p-value<0.05).

Figure S6

A

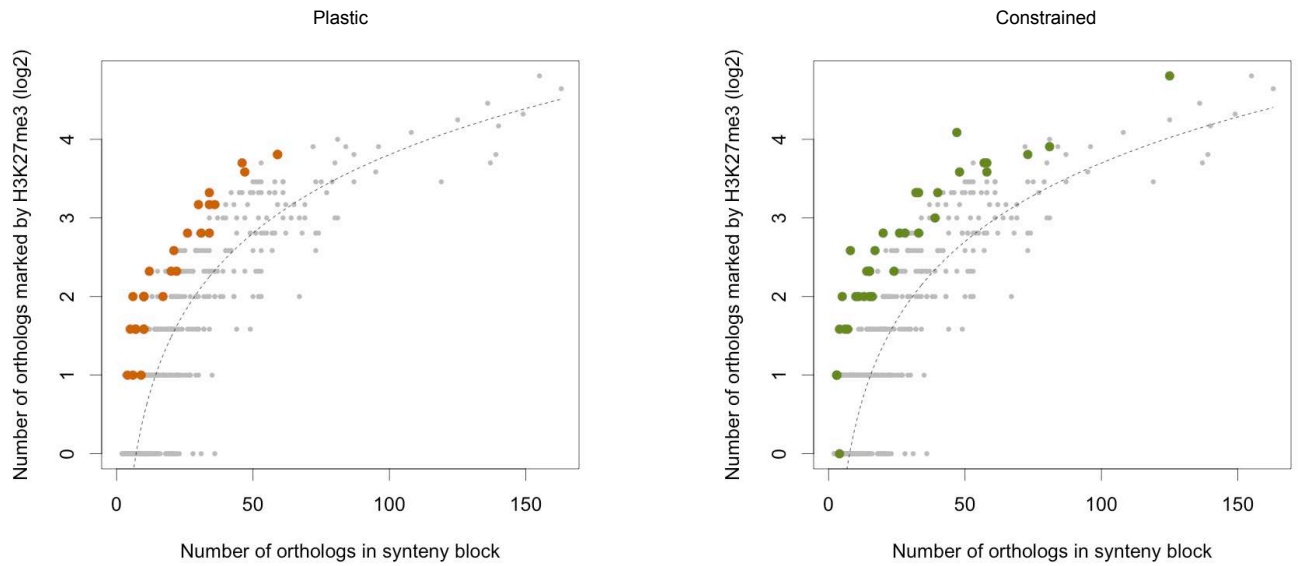

B

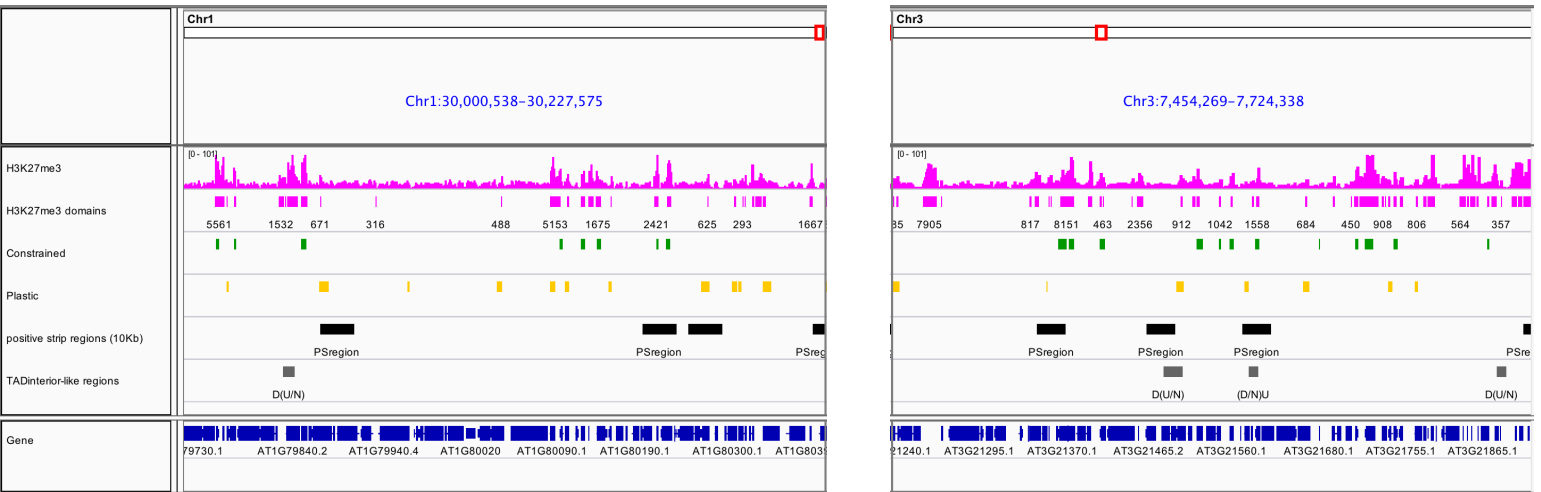

**Figure S6. Enrichment of H3K27me3 marking over syntenic blocks and their engagement in high connectivity regions.**

A. Number of gene orthologs with either plastic or constrained H3K27me3 marking within syntenic blocks. Colored dots represent syntenic blocks enriched in gene orthologs with plastic (orange) or constrained (green) marking (binomial test,  $p$ -value < 0.05). B. Integrative Genomics Viewer snapshots showing a syntenic block enriched in gene orthologs with plastic (left) and constrained (right) H3K27me3 marking and their overlap with the high (positive strip and TAD interior like regions) and low connectivity regions as defined in Wang et al. (2015).

Figure S7

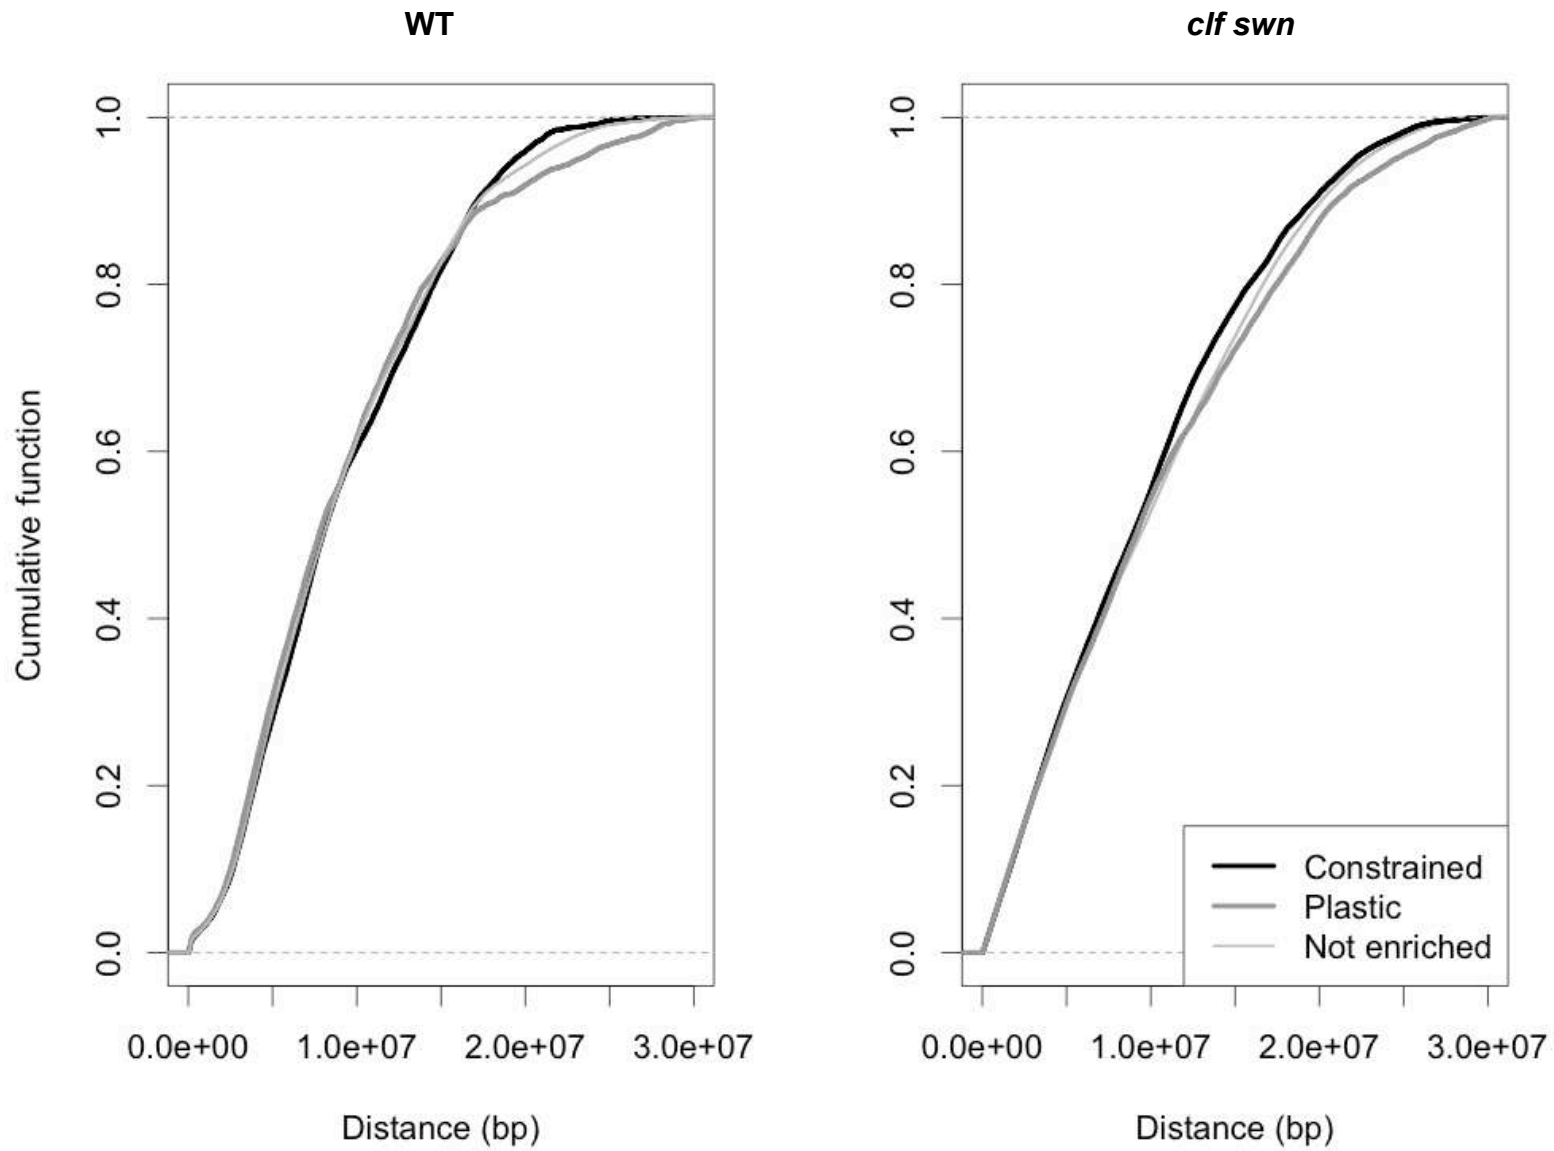

**Figure S7. H3K27me3 marking of gene orthologs in relation to distance distribution of intra-chromosomal interactions in *Ath*.**

Full-range cumulative function distribution of the length of strong intra-chromosomal contacts involving synteny blocks either not enriched or else enriched in gene orthologs with either plastic or constrained H3K27me3 marking. Results are shown for the wild type (WT) and the *clf swn* mutant.

Figure S8

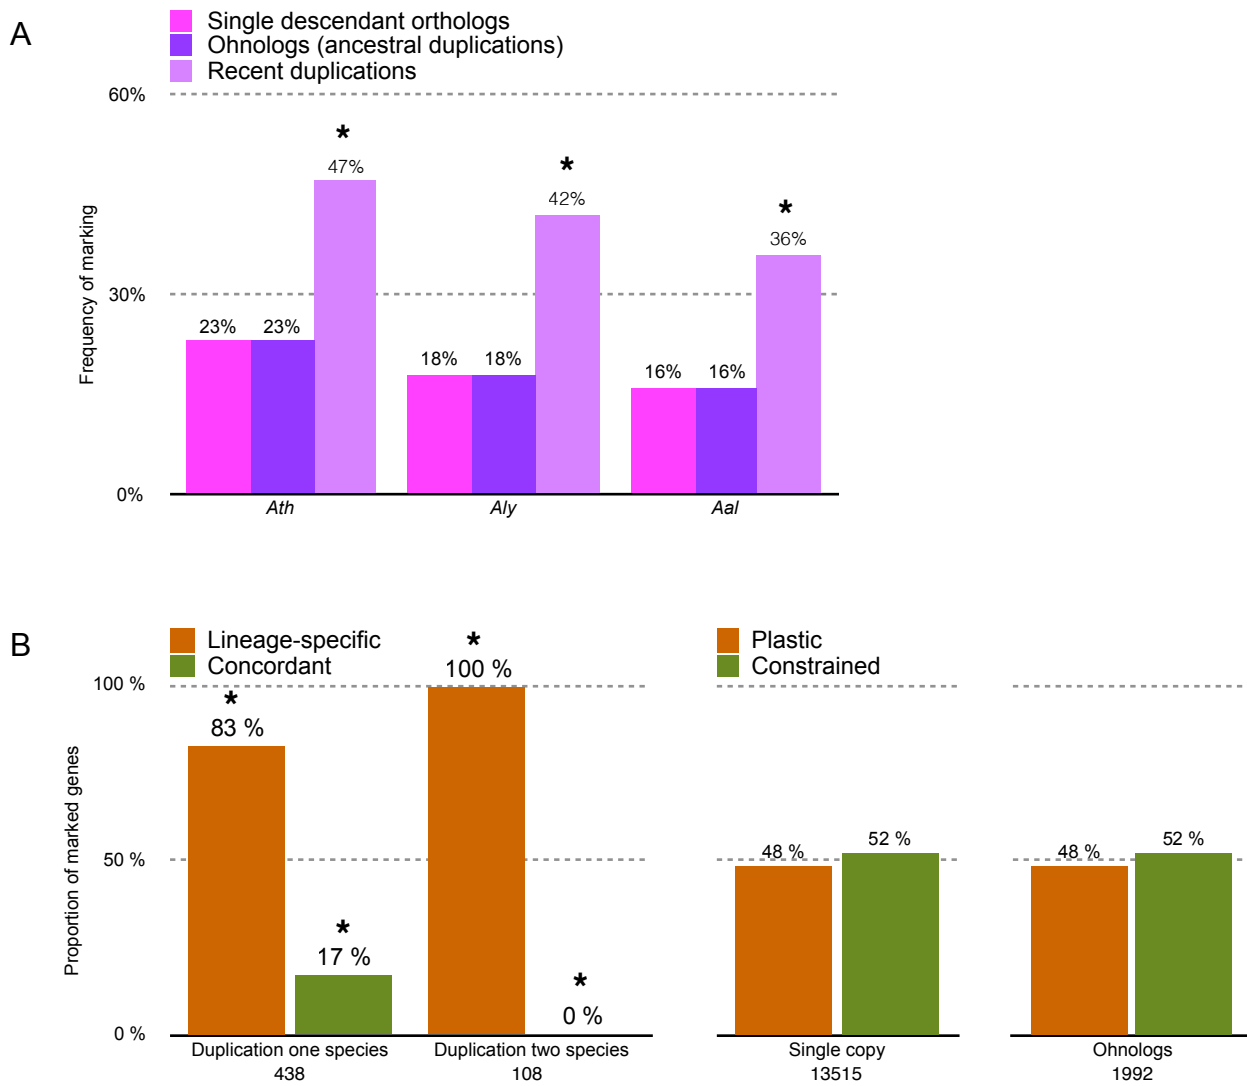

**Figure S8. H3K27me3 marking patterns in relation to ancestral and recent gene duplications**

A. Histograms represent the frequency of H3K27me3 marking within each species for the 13515 single descendant gene orthologs, the subset of 1992 gene ohnologs (ancient duplicates resulting from WGDs) and the 1316 gene orthologs that have undergone recent, species-specific duplication. Asterisks indicate significant differences with the frequency of marking of single descendant gene orthologs (t-test, p-value <0.05). B. Marking concordance between species in relation to gene duplication. Left: Proportion of gene orthologs with plastic or constrained H3K27me3 marking for single descendant gene orthologs and the subset of ohnologs. Right: Proportion of gene orthologs with lineage-specific or concordant marking for genes that have undergone recent species-specific duplication. The total number of genes included in the quantification is indicated below each graph. Asterisks indicate significant differences with the frequency of marking for single descendant gene orthologs (t-test, p-value <0.05). For the quantification over the complete set of 27343 Brassicaceae protogenes, see Additional file 1: Table S10.



Figure S9

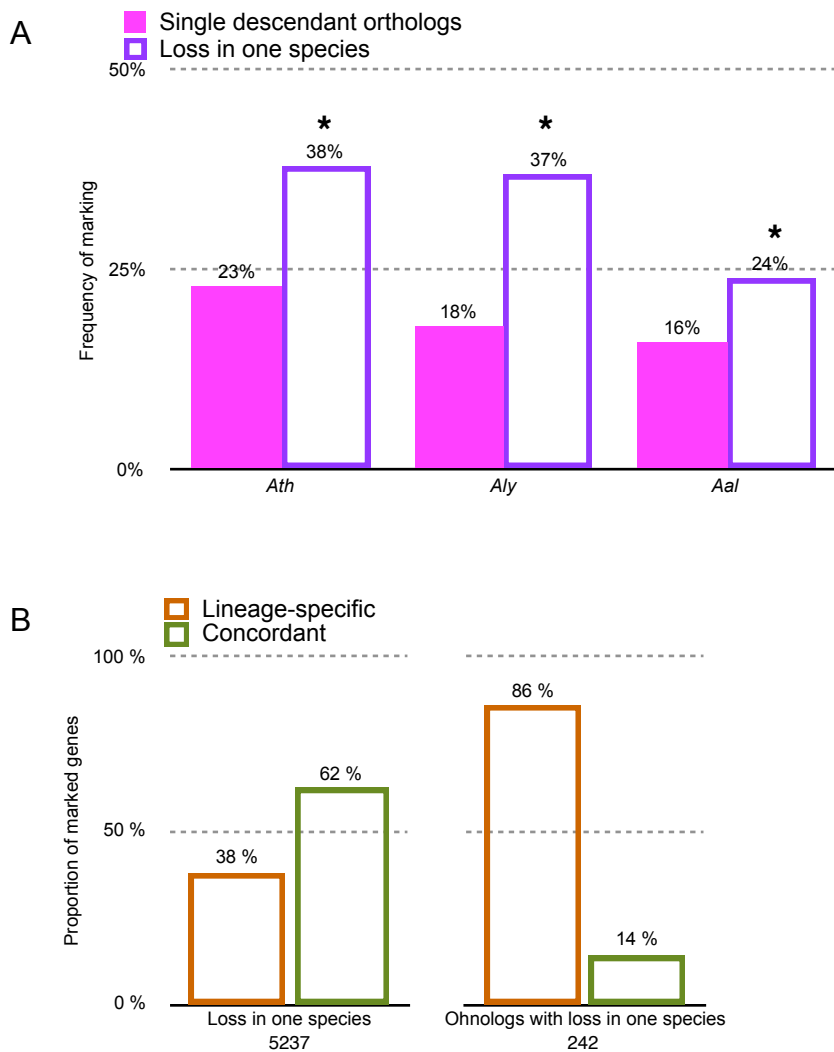

**Figure S9. H3K27me3 marking patterns in relation to gene loss.**

A. Histograms represent the frequency of H3K27me3 marking within each species for the set of 13515 single descendant gene orthologs present in all three species and the set of 12512 gene orthologs that have no representative (gene loss) in one species. Asterisks indicate significant differences with the frequency of marking of single descendant gene orthologs (t-test, p-value <0.05). B. Marking concordance between species in relation to gene loss. Proportion of gene orthologs with lineage-specific or concordant H3K27me3 marking for gene orthologs and the 242 for which ohnologs can be identified. The total number of gene orthologs included in the quantification is indicated below each graph. For the quantification over the complete set of 27343 Brassicaceae protogenes, see Additional file 1: Table S10.

**Table S1. Number of genes marked by H3K4me3 and H3K27me3 per species**

| <b>Marking</b>              | <b><i>Ath</i></b> | <b><i>Aly</i></b> | <b><i>Aal</i></b> |
|-----------------------------|-------------------|-------------------|-------------------|
| <b>H3K27me3 only</b>        | 5720              | 5196              | 4563              |
| <b>H3K4me3 only</b>         | 15116             | 15812             | 16921             |
| <b>H3K27me3 and H3K4me3</b> | 2726              | 2033              | 1970              |
| <b>Unmarked</b>             | 4934              | 4541              | 3711              |

**Table S2. Observed and expected marking frequencies among species**

| <b>H3K27me3 marking</b> | <b>Expected</b> | <b>Observed</b> |
|-------------------------|-----------------|-----------------|
| <b>3 species</b>        | 1113 (30%)      | 1464 (40%)      |
| <b>2 species</b>        | 1737 (48%)      | 806 (22%)       |
| <b>1 species</b>        | 823 (22%)       | 1403 (38%)      |

Chi-squared test, p-value <  $10^{-5}$

**Table S3. Distribution of gene orthologs with constrained or plastic H3K27me3 marking among gene families**

| H3K27me3-marked genes present in families                                                                      | Number of gene families | Total number of PRC2 targets |         |
|----------------------------------------------------------------------------------------------------------------|-------------------------|------------------------------|---------|
|                                                                                                                |                         | Constrained                  | Plastic |
| Only genes with constrained marking                                                                            | 688                     | 1077                         | 0       |
| Only genes with plastic marking                                                                                | 1119                    | 0                            | 1330    |
| More genes with constrained than plastic marking                                                               | 118                     | 357                          | 144     |
| More genes with plastic than constrained marking                                                               | 86                      | 105                          | 222     |
| Equal number of genes with constrained and plastic marking                                                     | 184                     | 219                          | 219     |
| 3673 genes present in the set of the 13515 genes corresponding to single gene descendants in all three species | 2195                    | 1758                         | 1915    |

**Table S4. ANOVA table for factors affecting coding and promoter sequence conservation per mark and species.**

| Sequence | Distance  | Comparison     | Mark     | p-value |         |         | Omega squared |        |
|----------|-----------|----------------|----------|---------|---------|---------|---------------|--------|
|          |           |                |          | Con     | Unq     | Con:Unq | Con           | Unq    |
| Coding   | DNA dist  | <i>Ath-Aly</i> | H3K27me3 | 5.0E-01 | 9.9E-02 | 4.7E-01 | -0.000        | 0.001  |
|          | DNA dist  | <i>Ath-Aal</i> | H3K27me3 | 4.9E-01 | 6.2E-03 | 3.4E-01 | -0.000        | 0.003  |
|          | DNA dist  | <i>Aly-Aal</i> | H3K27me3 | 6.2E-01 | 8.4E-02 | 8.4E-01 | -0.000        | 0.001  |
|          | DNA dist  | <i>Ath-Aly</i> | H3K4me3  | 9.9E-03 | 1.1E-03 | 5.2E-01 | 0.001         | 0.001  |
|          | DNA dist  | <i>Ath-Aal</i> | H3K4me3  | 1.1E-09 | 5.6E-22 | 2.1E-01 | 0.003         | 0.009  |
|          | DNA dist  | <i>Aly-Aal</i> | H3K4me3  | 9.3E-10 | 2.3E-29 | 1.5E-02 | 0.003         | 0.012  |
|          | 4-mer JSD | <i>Ath-Aly</i> | H3K27me3 | 1.6E-01 | 5.0E-09 | 1.2E-05 | 0.000         | 0.010  |
|          | 4-mer JSD | <i>Ath-Aal</i> | H3K27me3 | 3.8E-02 | 1.1E-04 | 3.4E-03 | 0.001         | 0.005  |
|          | 4-mer JSD | <i>Aly-Aal</i> | H3K27me3 | 9.6E-01 | 3.7E-10 | 6.6E-01 | -0.000        | 0.012  |
|          | 4-mer JSD | <i>Ath-Aly</i> | H3K4me3  | 4.5E-21 | 1.4E-17 | 1.7E-01 | 0.007         | 0.007  |
|          | 4-mer JSD | <i>Ath-Aal</i> | H3K4me3  | 6.2E-28 | 3.4E-32 | 5.1E-02 | 0.010         | 0.012  |
|          | 4-mer JSD | <i>Aly-Aal</i> | H3K4me3  | 3.1E-17 | 2.8E-38 | 1.5E-03 | 0.006         | 0.014  |
|          | 4-mer PC  | <i>Ath-Aly</i> | H3K27me3 | 6.3E-02 | 9.0E-08 | 2.6E-05 | 0.001         | 0.009  |
|          | 4-mer PC  | <i>Ath-Aal</i> | H3K27me3 | 2.4E-03 | 1.2E-04 | 7.0E-03 | 0.002         | 0.005  |
|          | 4-mer PC  | <i>Aly-Aal</i> | H3K27me3 | 7.7E-01 | 1.0E-11 | 6.6E-01 | -0.000        | 0.014  |
|          | 4-mer PC  | <i>Ath-Aly</i> | H3K4me3  | 6.3E-17 | 6.5E-19 | 9.0E-01 | 0.006         | 0.007  |
|          | 4-mer PC  | <i>Ath-Aal</i> | H3K4me3  | 3.3E-25 | 4.4E-34 | 1.6E-01 | 0.009         | 0.013  |
|          | 4-mer PC  | <i>Aly-Aal</i> | H3K4me3  | 2.3E-16 | 3.3E-44 | 1.2E-02 | 0.005         | 0.017  |
| Promoter | 4-mer JSD | <i>Ath-Aly</i> | H3K27me3 | 2.9E-19 | 5.8E-01 | 5.6E-01 | 0.022         | -0.000 |
|          | 4-mer JSD | <i>Ath-Aal</i> | H3K27me3 | 8.3E-15 | 1.6E-01 | 1.8E-04 | 0.016         | 0.001  |
|          | 4-mer JSD | <i>Aly-Aal</i> | H3K27me3 | 7.1E-20 | 6.2E-04 | 2.5E-01 | 0.022         | 0.004  |
|          | 4-mer JSD | <i>Ath-Aly</i> | H3K4me3  | 2.2E-01 | 1.3E-09 | 4.4E-01 | 0.000         | 0.004  |
|          | 4-mer JSD | <i>Ath-Aal</i> | H3K4me3  | 5.4E-01 | 4.5E-19 | 2.2E-01 | -0.000        | 0.007  |
|          | 4-mer JSD | <i>Aly-Aal</i> | H3K4me3  | 1.6E-02 | 3.6E-17 | 3.7E-02 | 0.000         | 0.007  |
|          | 4-mer PC  | <i>Ath-Aly</i> | H3K27me3 | 2.3E-25 | 6.0E-01 | 3.7E-01 | 0.031         | -0.000 |
|          | 4-mer PC  | <i>Ath-Aal</i> | H3K27me3 | 2.9E-21 | 6.6E-01 | 8.7E-03 | 0.025         | -0.000 |
|          | 4-mer PC  | <i>Aly-Aal</i> | H3K27me3 | 2.1E-25 | 3.7E-02 | 7.7E-01 | 0.031         | 0.002  |
|          | 4-mer PC  | <i>Ath-Aly</i> | H3K4me3  | 1.1E-01 | 1.4E-25 | 8.6E-02 | 0.000         | 0.012  |
|          | 4-mer PC  | <i>Ath-Aal</i> | H3K4me3  | 7.6E-01 | 6.9E-32 | 4.8E-01 | -0.000        | 0.015  |
|          | 4-mer PC  | <i>Aly-Aal</i> | H3K4me3  | 2.9E-02 | 4.8E-32 | 2.3E-03 | 0.000         | 0.015  |

4-mer = k-mers of length 4

PC = Pearson correlation

JSD = Jensen-Shannon divergence

Con = Concordance of marking

Unq = Uniqueness of marking

Con:Und = interaction between concordance and uniqueness











**Table S6. Number of genes orthologs in the three genomes and in syntenic blocks**

| Gene type                           | Whole genome      | Syntenic blocks |            |            |
|-------------------------------------|-------------------|-----------------|------------|------------|
|                                     |                   | <i>Ath</i>      | <i>Aly</i> | <i>Aal</i> |
| <b>Protogenes</b>                   | 27343             | 13522           | 16218      | 13522      |
| <b>With H3K27me3 marking</b>        | 5229, 4484, 3545* | 4506            | 3372       | 2280       |
| <b>Constrained H3K27me3 marking</b> | 1758              | 1567            | 1561       | 1293       |
| <b>Plastic H3K27me3 marking</b>     | 1915              | 1688            | 1685       | 1436       |
| <b>Unmarked</b>                     | 9842              | 9075            | 8998       | 7724       |

\* Total number of protogenes with H3K27me3 marking per genome: *Ath*, *Aly*, *Aal*

**Table S7. Number of synteny blocks with differential enrichment in gene orthologs with H3K27me3 marking**

| <b>Synteny block enrichment</b>     | <b><i>Ath</i></b> | <b><i>Aly</i></b> | <b><i>Aal</i></b> |
|-------------------------------------|-------------------|-------------------|-------------------|
| <b>Constrained H3K27me3 marking</b> | 34                | 32                | 63                |
| <b>Plastic H3K27me3 marking</b>     | 28                | 25                | 39                |
| <b>Not enriched</b>                 | 475               | 440               | 765               |

**Table S8. Co-occurrence of high-connectivity regions with genes marked by H3K27me3 in *Ath* synteny blocks**

| <b>H3K27me3<br/>marking</b> | <b>Total number of genes</b>    |                |                     | <b>Number of genes overlapping<br/>High-connectivity regions</b> |                |                     |
|-----------------------------|---------------------------------|----------------|---------------------|------------------------------------------------------------------|----------------|---------------------|
|                             | <b>Synteny block enrichment</b> |                |                     | <b>Synteny block enrichment</b>                                  |                |                     |
|                             | <b>Constrained</b>              | <b>Plastic</b> | <b>Not enriched</b> | <b>Constrained</b>                                               | <b>Plastic</b> | <b>Not enriched</b> |
| <b>Constrained</b>          | 238                             | 62             | 1267                | 108                                                              | 19             | 469                 |
| <b>Plastic</b>              | 126                             | 155            | 1407                | 42                                                               | 56             | 359                 |
| <b>Unmarked</b>             | 578                             | 365            | 8132                | 127                                                              | 52             | 1479                |

**Table S9. Contact distribution of *Ath* synteny blocks**

| Synteny block enrichment            | Total size (bp) | Number of contacts between 20 Kb windows - WT |         |         | Number of contacts between 20 Kb windows - <i>clf swm</i> |        |         |
|-------------------------------------|-----------------|-----------------------------------------------|---------|---------|-----------------------------------------------------------|--------|---------|
|                                     |                 | Strong                                        | Medium  | Weak    | Strong                                                    | Medium | Weak    |
| <b>Constrained H3K27me3 marking</b> | 7882021         | 91460                                         | 347469  | 78431   | 257518                                                    | 0      | 259842  |
| <b>Plastic H3K27me3 marking</b>     | 4048074         | 48437                                         | 190197  | 40958   | 138756                                                    | 0      | 140836  |
| <b>Not enriched</b>                 | 82150332        | 1028100                                       | 3600419 | 883999  | 2746930                                                   | 0      | 2765588 |
| <b>Total</b>                        | 94080427        | 1167997                                       | 4138085 | 1003388 | 3143204                                                   | 0      | 3166266 |

**Table S10. Marking concordance for all gene orthologs**

| H3K27me3 marking concordance | Gene orthologs with no recent duplicates |                |                |          |                |                |                    | Gene orthologs with recent duplicates |               |               |                |               |                |
|------------------------------|------------------------------------------|----------------|----------------|----------|----------------|----------------|--------------------|---------------------------------------|---------------|---------------|----------------|---------------|----------------|
|                              | Single copy                              | With loss      |                | Ohnologs |                |                |                    | Dup in three sp                       | Dup in two sp | Dup in one sp | Dup in two sp  | Dup in one sp | Dup in one sp  |
|                              | No loss                                  | Loss in one sp | Loss in two sp | No loss  | Loss in one sp | Loss in two sp | Loss in one/two sp | No loss                               |               |               | Loss in one sp |               | Loss in two sp |
| Constrained / concordant *   | 1758                                     | 3051           | -              | 268      | 9              | -              | 103                | 9                                     | 15            | 0             | 2              | 0             | -              |
| Plastic / lineage specific * | 1915                                     | 1366           | 4976           | 288      | 57             | 31             | 308                | 5                                     | 71            | 214           | 96             | 242           | 159            |
| Unmarked                     | 9842                                     | 820            | 2299           | 1436     | 176            | 137            | 1077               | 11                                    | 22            | 224           | 21             | 111           | 114            |
| Total                        | 13515                                    | 5237           | 7275           | 1992     | 242            | 168            | 1488               | 25                                    | 108           | 438           | 119            | 353           | 273            |
| Total by ancestral gene set  | 13515                                    | 12512          |                | 3890     |                |                |                    | 1316                                  |               |               |                |               |                |

\* Constrained and plastic H3K27me3 marking categories were defined only for the set of 13515 single-descendant gene orthologs. For orthologs with recent duplication or loss in one or two species the marking concordance is defined as lineage-specific (marked only in one species or in *Arabidopsis sp.*) or concordant (marked in three species for gene orthologs with recent duplicates or marked in two species for gene with loss in one species).  
sp = species

**Table S11. Reference genomes and annotated features**

| <b>Annotation</b>                    | <b><i>Ath</i></b> | <b><i>Aly</i></b> | <b><i>Aal</i></b> |
|--------------------------------------|-------------------|-------------------|-------------------|
| <b>Chromosomes / super-scaffolds</b> | 5 (119Mb)         | 8 (195Mb)         | 8 (235Mb)         |
| <b>Genes</b>                         | 28496             | 27582             | 27165             |
| <b>Transposable elements</b>         | 23322             | 47396             | 71937             |
